# Supplementary material for: Cancer mortality rates by racial and ethnic groups in the United States, 2018-2020
Source: PubMed Central journal article supplement — J Natl Cancer Inst. 2023 Apr 19;115(7):822–30. doi: 10.1093/jnci/djad069 (PMC10323905; doi:10.1093/jnci/djad069), 2023-04-19
Supplement: djad069_supplementary_data.pdf [file djad069_supplementary_data.pdf]

**Supplementary Table 1: Age Adjusted Malignant Cancer Death Rate among NHPI and Asian populations separately and combined in the US, Aged 20 or Older From 2018 to 2020**

| <b>Cancer Site</b>                 | <b>NHPI Populations</b> | <b>Asian Populations</b> | <b>NHPI and Asian Populations Aggregated</b> |
|------------------------------------|-------------------------|--------------------------|----------------------------------------------|
| <i>All Cancers</i>                 | 197.3                   | 126.8                    | 128.7                                        |
| <i>Oral Cavity and Pharynx</i>     | 3.7                     | 2.8                      | 2.8                                          |
| <i>Esophagus</i>                   | 2.8                     | 2.1                      | 2.1                                          |
| <i>Stomach</i>                     | 8.7                     | 6                        | 6.1                                          |
| <i>Colorectum</i>                  | 14.6                    | 12.5                     | 12.6                                         |
| <i>Liver</i>                       | 15.1                    | 11.4                     | 11.5                                         |
| <i>Pancreas</i>                    | 12.2                    | 10.4                     | 10.5                                         |
| <i>Lung</i>                        | 38.5                    | 26.1                     | 26.4                                         |
| <i>Soft Tissue including Heart</i> | 2.7                     | 1.2                      | 1.2                                          |
| <i>Breast</i>                      | 33.2                    | 15.9                     | 16.3                                         |
| <i>Cervix</i>                      | 6.9                     | 2.1                      | 2.2                                          |
| <i>Uterus</i>                      | 19.5                    | 4.6                      | 5                                            |
| <i>Ovary</i>                       | 7.8                     | 6                        | 6                                            |
| <i>Prostate</i>                    | 23                      | 11.6                     | 11.8                                         |
| <i>Bladder</i>                     | 3.9                     | 2.3                      | 2.4                                          |
| <i>Kidney</i>                      | 3.7                     | 2.1                      | 2.2                                          |
| <i>CNS</i>                         | 3.8                     | 3                        | 3.1                                          |
| <i>Non-Hodgkin Lymphoma</i>        | 6.8                     | 4.9                      | 4.9                                          |
| <i>Myeloma</i>                     | 3.8                     | 2                        | 2.1                                          |
| <i>Leukemia</i>                    | 7.9                     | 4.4                      | 4.5                                          |

Abbreviations: NHPI=Native Hawaiian and Pacific Islander; CNS= Central Nervous System

**Supplementary Table 2. Age adjusted site specific death rate per 100,000 for three leading causes of cancer among the US population, stratified by racial/ethnic group, sex and age - 2018-2020**

|              |                                 | Female        |               |               | Male          |               |               |
|--------------|---------------------------------|---------------|---------------|---------------|---------------|---------------|---------------|
|              |                                 | Cancer Site 1 | Cancer Site 2 | Cancer Site 3 | Cancer Site 1 | Cancer Site 2 | Cancer Site 3 |
| <b>20-49</b> | <b>All Racial/Ethnic groups</b> |               |               |               |               |               |               |
|              | Cause                           | Breast        | Colorectum    | Cervix        | Colorectum    | Lung          | CNS           |
|              | Death Rate                      | 6.8           | 2.6           | 1.9           | 3.5           | 2.2           | 2.1           |
|              | <b>AI/AN</b>                    |               |               |               |               |               |               |
|              | Cause                           | Breast        | Colorectum    | Cervix        | Colorectum    | Stomach       | Lung          |
|              | Death Rate                      | 6.9           | 3.5           | 2.8           | 6.3           | 1.9           | 1.9           |
|              | <b>Asian</b>                    |               |               |               |               |               |               |
|              | Cause                           | Breast        | Colorectum    | Lung          | Colorectum    | Liver         | Lung          |
|              | Death Rate                      | 4.5           | 1.9           | 1.7           | 2.4           | 1.8           | 1.5           |
|              | <b>Black</b>                    |               |               |               |               |               |               |
|              | Cause                           | Breast        | Colorectum    | Cervix        | Colorectum    | Lung          | Pancreas      |
|              | Death Rate                      | 12.1          | 3.6           | 2.4           | 4.7           | 3.3           | 1.8           |
|              | <b>Latino</b>                   |               |               |               |               |               |               |
|              | Cause                           | Breast        | Colorectum    | Cervix        | Colorectum    | Leukemia      | Stomach       |
|              | Death Rate                      | 5.1           | 2.1           | 2.0           | 2.7           | 1.6           | 1.6           |
|              | <b>NHPI</b>                     |               |               |               |               |               |               |
| Cause        | Uterus                          | Breast        | Cervix        | Liver         | Colorectum    | Lung          |               |
| Death Rate   | 9.4                             | 8.2           | 4.4           | 7.8           | 7.2           | 3.6           |               |
| <b>White</b> |                                 |               |               |               |               |               |               |
| Cause        | Breast                          | Colorectum    | Lung          | Colorectum    | CNS           | Lung          |               |
| Death Rate   | 6.5                             | 2.6           | 2.3           | 3.7           | 2.7           | 2.5           |               |
| <b>50-69</b> | <b>All Racial/Ethnic groups</b> |               |               |               |               |               |               |
|              | Cause                           | Lung          | Breast        | Colorectum    | Lung          | Colorectum    | Pancreas      |
|              | Death Rate                      | 50.7          | 38.1          | 17.7          | 69.0          | 28.2          | 23.7          |
|              | <b>AI/AN</b>                    |               |               |               |               |               |               |
| Cause        | Lung                            | Breast        | Colorectum    | Lung          | Liver         | Colorectum    |               |

|            |                                 |        |          |            |       |            |            |
|------------|---------------------------------|--------|----------|------------|-------|------------|------------|
|            | Death Rate                      | 52.5   | 31.3     | 24.4       | 64.5  | 47.3       | 38.2       |
|            | <b>Asian</b>                    |        |          |            |       |            |            |
|            | Cause                           | Breast | Lung     | Colorectum | Lung  | Liver      | Colorectum |
|            | Death Rate                      | 25.1   | 21.4     | 12.0       | 35.9  | 24.0       | 19.4       |
|            | <b>Black</b>                    |        |          |            |       |            |            |
|            | Cause                           | Breast | Lung     | Colorectum | Lung  | Colorectum | Prostate   |
|            | Death Rate                      | 58.7   | 52.5     | 25.6       | 92.7  | 42.7       | 38.2       |
|            | <b>Latino</b>                   |        |          |            |       |            |            |
|            | Cause                           | Breast | Lung     | Colorectum | Liver | Lung       | Colorectum |
|            | Death Rate                      | 28.4   | 15.9     | 13.4       | 29.4  | 26.0       | 23.9       |
|            | <b>NHPI</b>                     |        |          |            |       |            |            |
|            | Cause                           | Breast | Lung     | Uterus     | Lung  | Liver      | Colorectum |
|            | Death Rate                      | 61.0   | 42.5     | 34.1       | 65.1  | 35.3       | 25.8       |
|            | <b>White</b>                    |        |          |            |       |            |            |
|            | Cause                           | Lung   | Breast   | Colorectum | Lung  | Colorectum | Pancreas   |
|            | Death Rate                      | 58.8   | 37.2     | 17.6       | 75.0  | 27.4       | 24.2       |
| <b>70+</b> | <b>All Racial/Ethnic groups</b> |        |          |            |       |            |            |
|            | Cause                           | Lung   | Breast   | Colorectum | Lung  | Prostate   | Colorectum |
|            | Death Rate                      | 194.3  | 102.2    | 68.7       | 285.5 | 171.3      | 93.9       |
|            | <b>AI/AN</b>                    |        |          |            |       |            |            |
|            | Cause                           | Lung   | Breast   | Colorectum | Lung  | Prostate   | Colorectum |
|            | Death Rate                      | 207.5  | 97.1     | 88.1       | 250.0 | 164.3      | 109.8      |
|            | <b>Asian</b>                    |        |          |            |       |            |            |
|            | Cause                           | Lung   | Pancreas | Breast     | Lung  | Prostate   | Liver      |
|            | Death Rate                      | 108.9  | 53.8     | 51.5       | 180.3 | 78.5       | 74.6       |
|            | <b>Black</b>                    |        |          |            |       |            |            |
|            | Cause                           | Lung   | Breast   | Pancreas   | Lung  | Prostate   | Colorectum |
|            | Death Rate                      | 177.5  | 125.3    | 82.7       | 330.3 | 328.6      | 130.7      |
|            | <b>Latino</b>                   |        |          |            |       |            |            |
|            | Cause                           | Lung   | Breast   | Pancreas   | Lung  | Prostate   | Colorectum |
|            | Death Rate                      | 83.8   | 66.2     | 60.5       | 160.5 | 139.8      | 84.5       |

|            |              |        |            |       |          |            |
|------------|--------------|--------|------------|-------|----------|------------|
|            | <b>NHPI</b>  |        |            |       |          |            |
| Cause      | Lung         | Breast | Pancreas   | Lung  | Prostate | Liver      |
| Death Rate | 139.1        | 95.8   | 51.1       | 220.3 | 143.6    | 59.8       |
|            | <b>White</b> |        |            |       |          |            |
| Cause      | Lung         | Breast | Colorectum | Lung  | Prostate | Colorectum |
| Death Rate | 214.3        | 106.7  | 70.0       | 300.7 | 165.8    | 93.4       |
